# Supplementary material for: Farmers’ and Experts’ Knowledge Coping with Sheep Health, Control and Anthelmintic Resistance of Their Gastrointestinal Nematodes
Source: MDPI journal article supplement (doi:10.3390/pathogens13040297), 2024-04-02

**Figure S1: Centroid cluster analysis of the views of farmers on gastrointestinal nematodes infection and control in three types of farms**

**Codes of semi-qualitative data:**

Importance of strongyles-GIN: strii

Resistance originated from elsewhere: reai

Resistance exists on farm: rese

Number of treatments with synthetic anthelmintics: trant

Choice of anthelmintics: cant

Use of natural treatments: tsna

Use of selective treatments: tsel

Visible results of the treatments: revi

Importance of the veterinarian: veto

**Conventional meat sheep (Centre of France)**

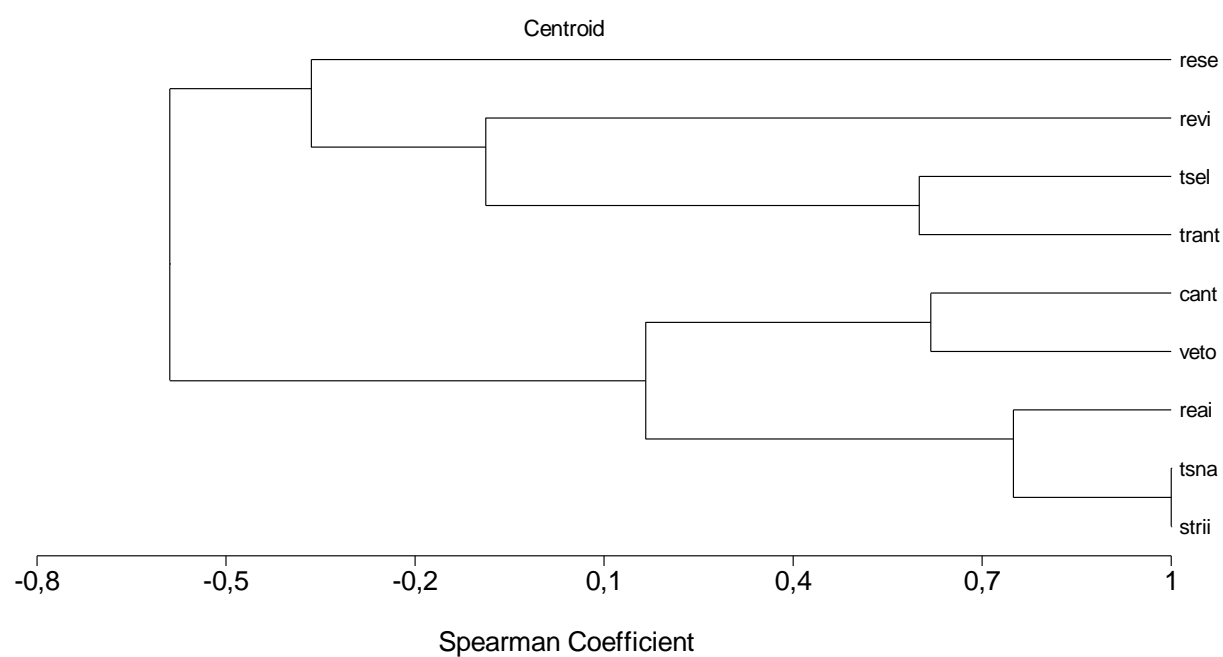

### Organic meat sheep (Centre of France)

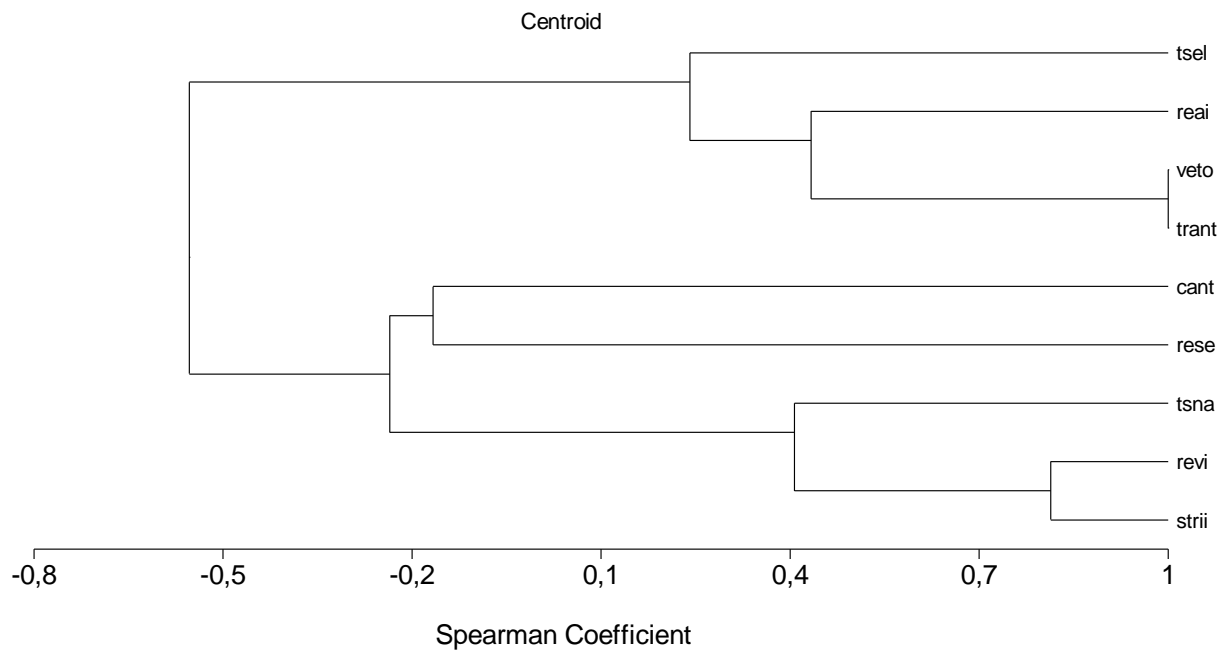

### Milk sheep (French Basque region)

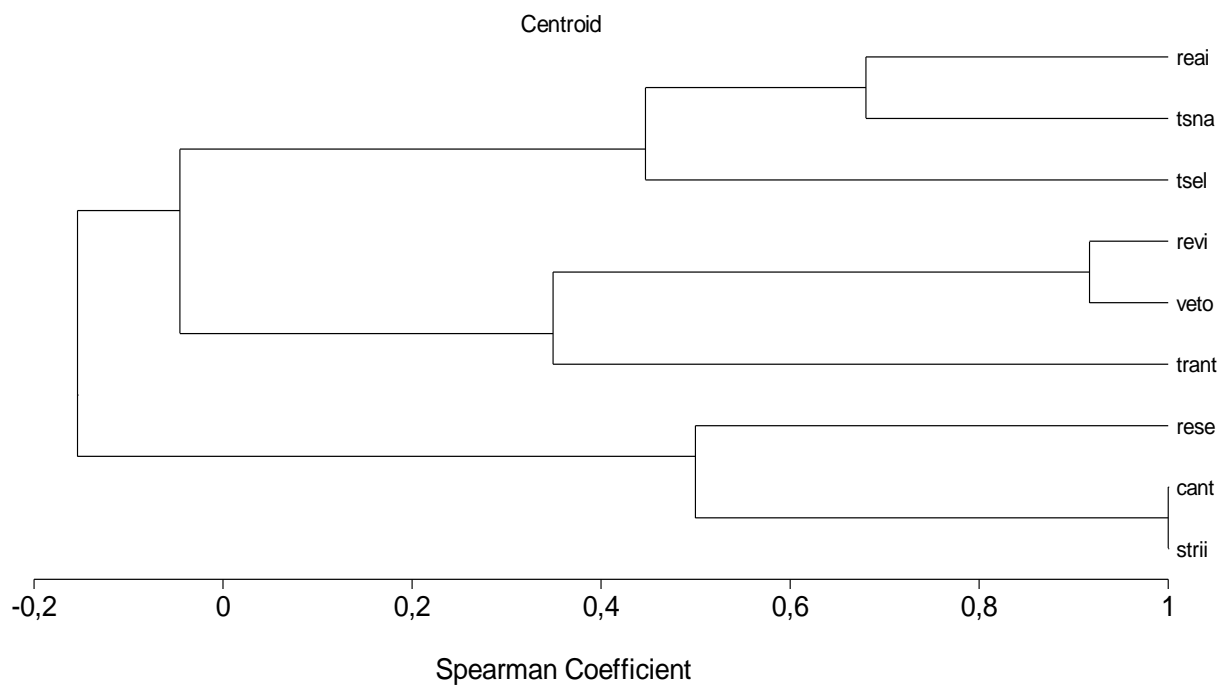

Supplement: s1 [file s1]
